# Supplementary material for: The Diverse Genomic Landscape of Diamond–Blackfan Anemia: Two Novel Variants and a Mini-Review
Source: MDPI journal article supplement (doi:10.3390/children10111812), 2023-11-15

Supplementary Figure S1.

(A) Mutation analysis for *RPS17* variant

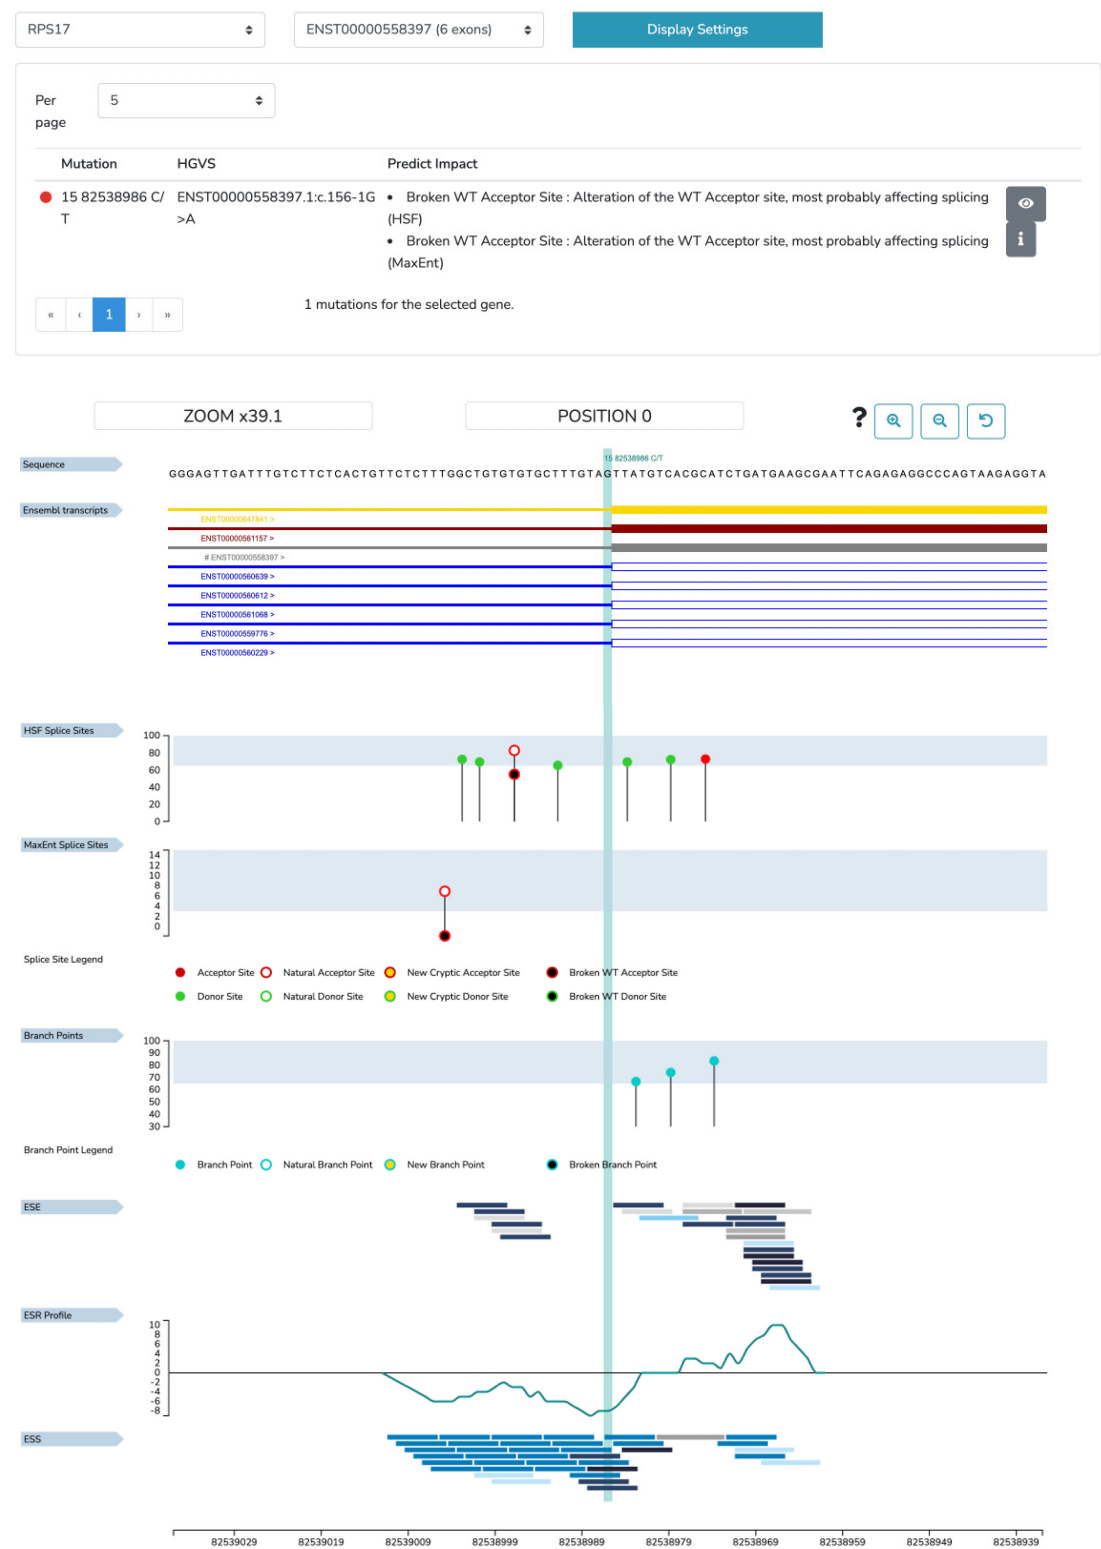

(B) Mutation analysis for *RPS26* variant

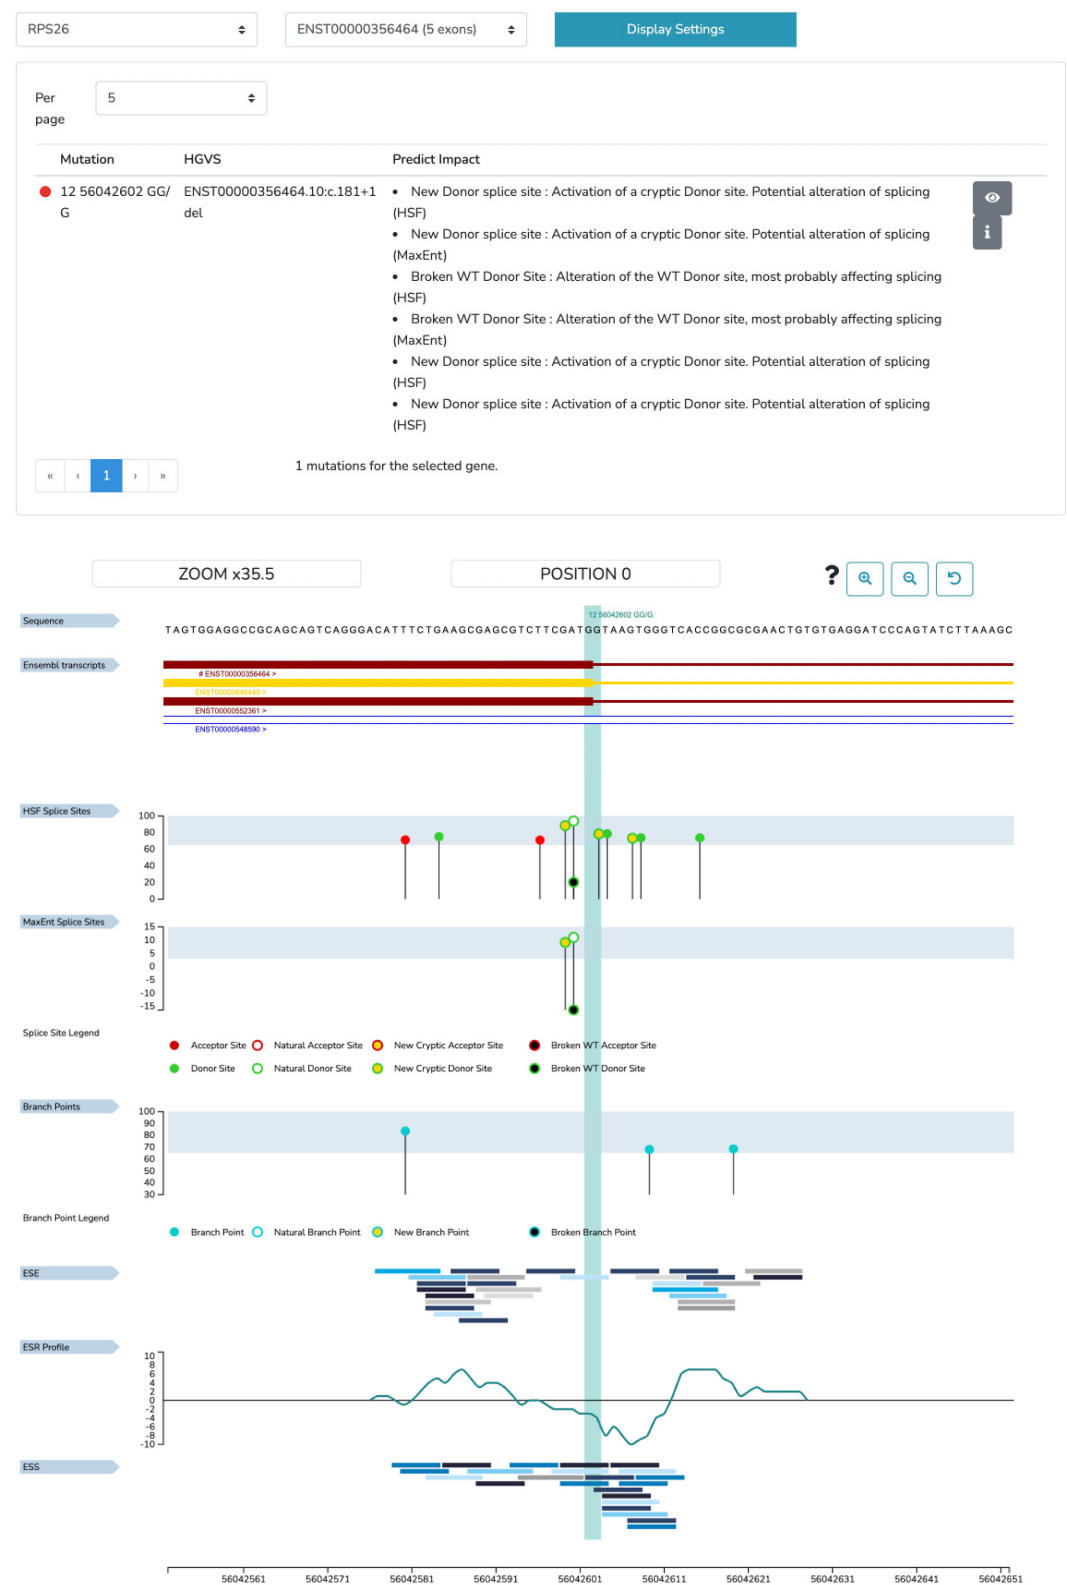

Supplement: s1 [file s1]
